# Supplementary material for: Metagenomic analysis of nitrogen and methane cycling in the Arabian Sea oxygen minimum zone
Source: PeerJ journal article supplement (doi:10.7717/peerj.1924), 2016-04-07

# Assembly of 16S rRNA

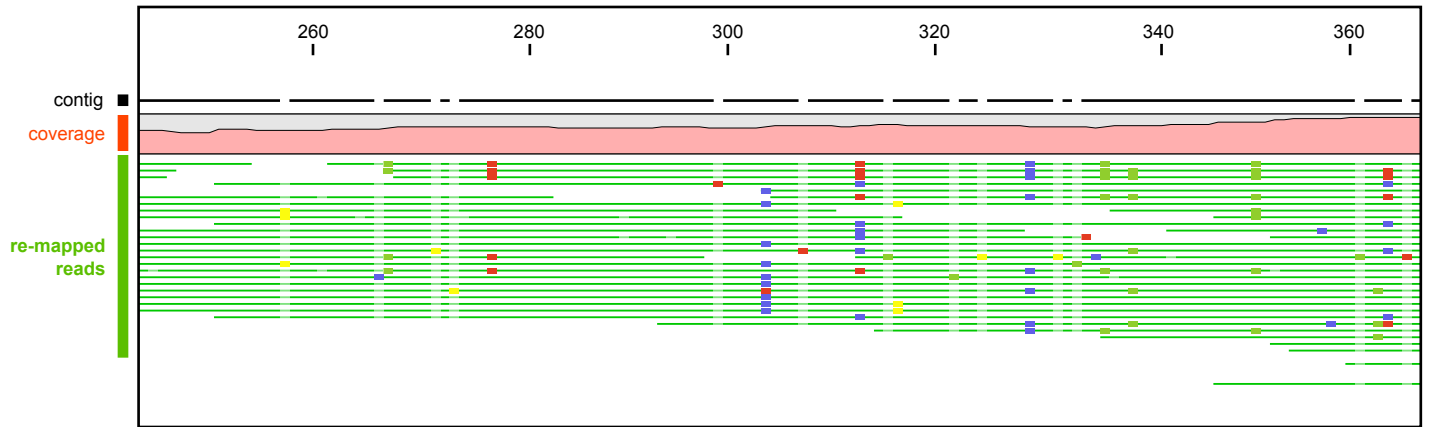

Supplement: FigureS1.pdf [file FigureS1.pdf]
