# Supplementary material for: Metagenomic analysis of nitrogen and methane cycling in the Arabian Sea oxygen minimum zone
Source: PubMed Central journal article supplement (PMC4830246; doi:10.7717/peerj.1924), 2016-04-07

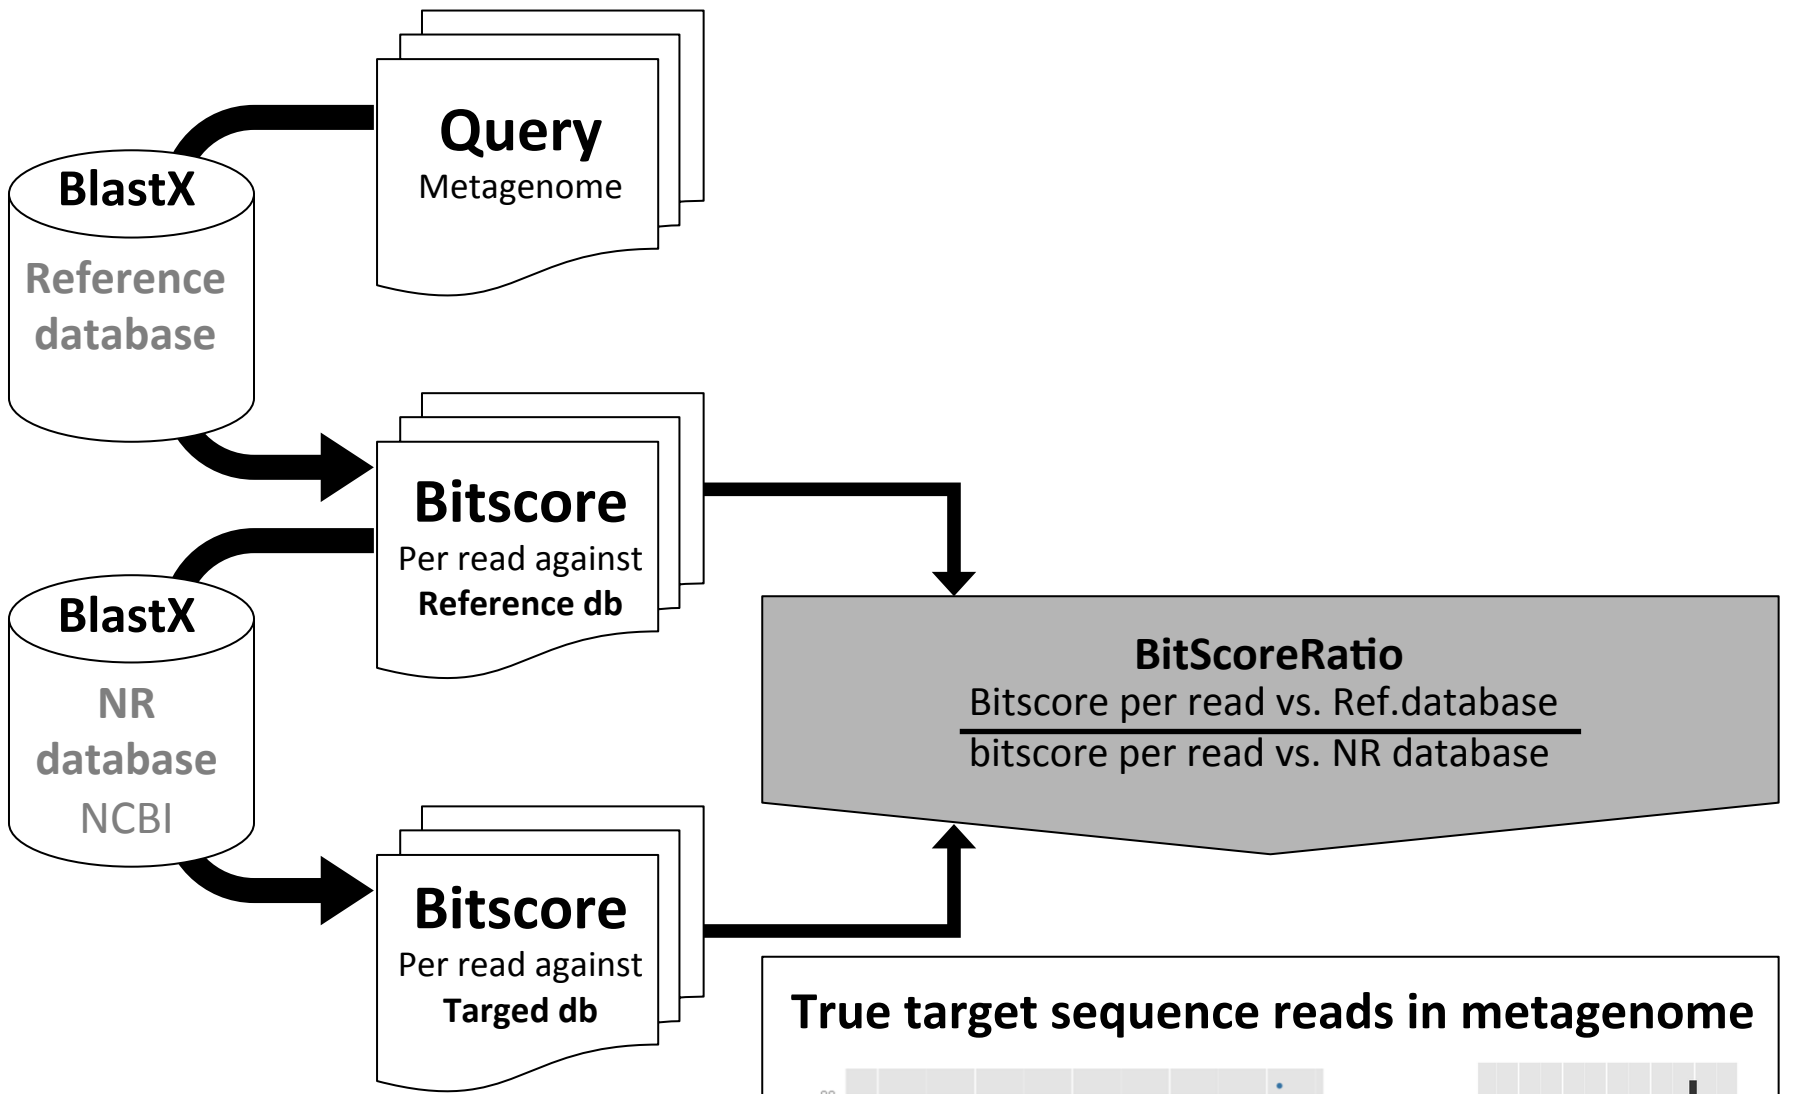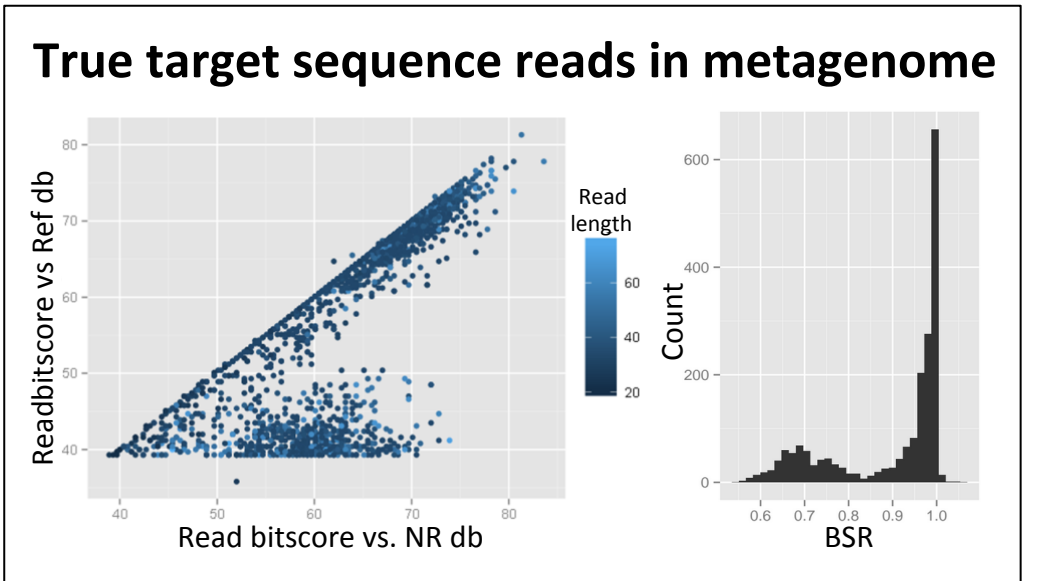

Supplement: peerj-04-1924-s002.pdf [file peerj-04-1924-s002.pdf]
